# Supplementary material
Source: MDPI journal article supplement (https://www.mdpi.com/2673-8112/2/3/18)
Supplement: s1 [file s1]

## **SUPPORTING INFORMATION**

### **New In Silico Insights into the Application of (Hydroxy)Chloroquine with Macrolide Antibiotic Co-Crystals Against the SARS-CoV-2 Virus**

**Alexandre A. de Castro <sup>1</sup>, Leticia C. Assis <sup>1</sup>, Elaine F. F. da Cunha <sup>1</sup>, Teodorico C. Ramalho <sup>1,2</sup> and  
Felipe A. La Porta <sup>3,4,\*</sup>**

<sup>1</sup> Department of Chemistry, Federal University of Lavras, Lavras 37200-000, Brazil;  
alexandre.a.castro@hotmail.com (A.A.d.C.); leticiaassis2008@hotmail.com (L.C.A.);  
elaine\_cunha@dqf.ufpa.br (E.F.F.d.C.); teo@dqf.ufpa.br (T.C.R.)

<sup>2</sup> Department of Chemistry, Faculty of Science, University of Hradec Kralove, Rokitanskeho 62, 500 03  
Hradec Kralove, Czech Republic

<sup>3</sup> Laboratory of Nanotechnology and Computational Chemistry, Department of Chemistry, Federal  
Technological University of Paraná, Avenida dos Pioneiros 3131, Londrina 86036-370, Brazil

<sup>4</sup> Post-graduation Program in Chemistry, State University of Londrina, Rodovia Celso Garcia Cid, 445,  
km 380, Londrina 86057-970, Brazil

\* Correspondence: felipe\_laporta@yahoo.com.br or felipelaporta@utfpr.edu.br

#### **Contents**

**Table S1.** Cartesian coordinates (in Å) for co-crystals computed at PM6.

**Figure S1.** Intermolecular interactions of single-crystals in the viral M<sup>pro</sup> active site.

**Table S1.** Cartesian coordinates (in Å) for co-crystals computed at PM6.

| Co-crystal CQ/AZ |             |             |             |
|------------------|-------------|-------------|-------------|
| O                | 6.26250000  | -1.23120000 | -0.99040000 |
| O                | 4.49360000  | -2.62720000 | -0.78790000 |
| O                | 5.47030000  | -2.61420000 | 2.28260000  |
| H                | 4.94010000  | -3.06690000 | 1.58250000  |
| O                | 8.02220000  | -2.04270000 | 2.11070000  |
| H                | 7.49580000  | -2.74000000 | 2.59080000  |
| O                | 1.86860000  | -0.71780000 | -2.22610000 |
| O                | 1.26480000  | 3.22180000  | -0.77910000 |
| O                | 1.56710000  | 0.05640000  | 0.94640000  |
| H                | 0.85250000  | -0.49360000 | 0.53230000  |
| O                | 0.90640000  | 6.13430000  | -2.38820000 |
| H                | 0.91080000  | 7.07890000  | -2.10510000 |
| O                | -0.55570000 | 3.15800000  | -2.24820000 |
| O                | -0.71140000 | -1.58510000 | -4.42280000 |
| O                | -2.66510000 | -1.88070000 | -2.77860000 |
| H                | -2.47380000 | -1.29880000 | -3.57530000 |
| O                | 0.42970000  | -1.84530000 | -0.80720000 |
| N                | 4.09690000  | 0.09460000  | 3.02630000  |
| N                | -1.18970000 | 6.77760000  | 0.05020000  |
| C                | 4.97350000  | -1.60810000 | -1.24120000 |
| C                | 4.31740000  | -0.54420000 | -2.10490000 |
| H                | 4.99540000  | 0.35330000  | -2.12430000 |
| C                | 2.95910000  | -0.12130000 | -1.47330000 |
| H                | 2.89700000  | -0.47540000 | -0.40520000 |
| C                | 2.73230000  | 1.40850000  | -1.51840000 |
| H                | 3.57250000  | 1.89280000  | -0.95520000 |
| C                | 1.41030000  | 1.78270000  | -0.79670000 |
| H                | 0.54390000  | 1.32510000  | -1.32190000 |
| C                | 1.36560000  | 1.46590000  | 0.75060000  |
| C                | 2.54230000  | 2.12570000  | 1.49230000  |
| H                | 2.58990000  | 3.19010000  | 1.18870000  |
| H                | 3.47880000  | 1.65290000  | 1.12440000  |
| C                | 2.48600000  | 1.98780000  | 3.02800000  |
| H                | 1.67540000  | 1.25740000  | 3.28690000  |
| C                | 3.81840000  | 1.44020000  | 3.61200000  |
| H                | 4.65050000  | 2.12630000  | 3.34960000  |
| H                | 3.75700000  | 1.42420000  | 4.72090000  |
| C                | 5.52640000  | -0.32890000 | 3.11840000  |
| H                | 6.16300000  | 0.58910000  | 2.96200000  |
| C                | 5.72070000  | -1.24910000 | 1.87870000  |
| H                | 4.97600000  | -0.95200000 | 1.10320000  |
| C                | 7.15330000  | -1.27730000 | 1.26540000  |
| C                | 7.09960000  | -2.05400000 | -0.09500000 |
| H                | 6.61510000  | -3.04610000 | 0.04250000  |
| C                | 3.12900000  | -0.93340000 | 3.49870000  |
| H                | 3.48320000  | -1.94460000 | 3.23880000  |
| H                | 2.18140000  | -0.76550000 | 2.94480000  |
| H                | 2.92670000  | -0.91010000 | 4.57750000  |
| C                | 4.20240000  | -1.09290000 | -3.52540000 |
| H                | 3.58440000  | -0.42820000 | -4.14530000 |
| H                | 3.72060000  | -2.07900000 | -3.54470000 |
| H                | 5.18610000  | -1.18480000 | -4.00080000 |
| C                | 5.96510000  | -1.00100000 | 4.41820000  |
| H                | 5.70000000  | -0.40010000 | 5.29220000  |
| H                | 7.05050000  | -1.16170000 | 4.42560000  |
| H                | 5.49640000  | -1.98860000 | 4.53550000  |
| C                | 7.79700000  | 0.09270000  | 1.12280000  |
| H                | 7.60220000  | 0.72650000  | 2.00080000  |
| H                | 7.42870000  | 0.61520000  | 0.23140000  |
| H                | 8.88910000  | -0.00220000 | 1.04360000  |
| C                | 8.44830000  | -2.16590000 | -0.79760000 |
| H                | 9.23040000  | -2.34590000 | -0.02530000 |

|    |             |             |             |
|----|-------------|-------------|-------------|
| H  | 8.70090000  | -1.19630000 | -1.27400000 |
| C  | 8.46690000  | -3.27940000 | -1.83860000 |
| H  | 9.43210000  | -3.31680000 | -2.35720000 |
| H  | 7.69010000  | -3.13080000 | -2.59820000 |
| H  | 8.30270000  | -4.26420000 | -1.38520000 |
| C  | 2.76060000  | 1.92220000  | -2.95830000 |
| H  | 2.59750000  | 3.01110000  | -3.00140000 |
| H  | 1.98180000  | 1.44360000  | -3.56440000 |
| H  | 3.72520000  | 1.73120000  | -3.43980000 |
| C  | -0.01120000 | 1.84530000  | 1.29460000  |
| H  | -0.81820000 | 1.25530000  | 0.82570000  |
| H  | -0.22800000 | 2.91150000  | 1.10330000  |
| H  | -0.07400000 | 1.67300000  | 2.37660000  |
| C  | 2.16020000  | 3.33010000  | 3.69560000  |
| H  | 2.03850000  | 3.22120000  | 4.77860000  |
| H  | 1.22360000  | 3.74330000  | 3.30420000  |
| H  | 2.94390000  | 4.07470000  | 3.52390000  |
| C  | 0.58860000  | 3.87780000  | -1.87010000 |
| H  | 1.22700000  | 3.83910000  | -2.78860000 |
| C  | 0.42190000  | 5.30890000  | -1.31030000 |
| H  | 1.10360000  | 5.43700000  | -0.43350000 |
| C  | -1.03980000 | 5.68820000  | -0.96000000 |
| H  | -1.53480000 | 6.05850000  | -1.90170000 |
| C  | -1.76260000 | 4.41790000  | -0.48530000 |
| H  | -2.77360000 | 4.66520000  | -0.09520000 |
| H  | -1.22130000 | 3.95060000  | 0.37120000  |
| C  | -1.86210000 | 3.43630000  | -1.64890000 |
| H  | -2.42520000 | 3.87570000  | -2.50670000 |
| C  | -2.43070000 | 2.08330000  | -1.25780000 |
| H  | -2.43490000 | 1.39550000  | -2.10930000 |
| H  | -3.46220000 | 2.18170000  | -0.88720000 |
| H  | -1.84420000 | 1.61120000  | -0.45310000 |
| C  | -0.72810000 | 8.08560000  | -0.50220000 |
| H  | -1.42240000 | 8.38930000  | -1.30480000 |
| H  | 0.29880000  | 8.08480000  | -0.90790000 |
| H  | -0.78850000 | 8.86070000  | 0.27870000  |
| C  | -0.52630000 | 6.48440000  | 1.35230000  |
| H  | -0.97900000 | 5.57830000  | 1.79000000  |
| H  | -0.73400000 | 7.30850000  | 2.05440000  |
| H  | 0.56280000  | 6.33720000  | 1.29970000  |
| C  | 1.45310000  | -2.01860000 | -1.78250000 |
| H  | 2.25330000  | -2.53510000 | -1.19700000 |
| C  | 1.00790000  | -2.78050000 | -3.03380000 |
| H  | 1.23920000  | -3.85500000 | -2.86960000 |
| H  | 1.65610000  | -2.47090000 | -3.88600000 |
| C  | -0.45630000 | -2.64190000 | -3.45950000 |
| C  | -1.41600000 | -2.36970000 | -2.26270000 |
| H  | -1.68190000 | -3.30950000 | -1.73390000 |
| C  | -0.84120000 | -1.32530000 | -1.28030000 |
| H  | -0.64460000 | -0.35230000 | -1.80200000 |
| C  | -0.92220000 | -3.87030000 | -4.24930000 |
| H  | -0.32010000 | -3.99890000 | -5.15890000 |
| H  | -1.96170000 | -3.74430000 | -4.58040000 |
| H  | -0.85760000 | -4.79010000 | -3.66170000 |
| C  | 0.00080000  | -0.33940000 | -4.28490000 |
| H  | -0.42570000 | 0.26980000  | -5.08870000 |
| H  | 1.07600000  | -0.49720000 | -4.42960000 |
| H  | -0.17700000 | 0.11100000  | -3.29530000 |
| C  | -1.67290000 | -1.15050000 | -0.03040000 |
| H  | -1.24710000 | -0.39290000 | 0.65100000  |
| H  | -1.75850000 | -2.07610000 | 0.57340000  |
| H  | -2.70290000 | -0.82490000 | -0.26780000 |
| Cl | -5.18370000 | 3.48380000  | 0.85650000  |
| N  | -3.69690000 | -2.69190000 | 3.33790000  |
| H  | -3.53790000 | -2.67710000 | 4.35300000  |
| N  | -7.46770000 | -0.91110000 | 2.22320000  |
| H  | -8.26060000 | -0.32780000 | 2.52290000  |

|   |             |             |             |
|---|-------------|-------------|-------------|
| N | -5.80000000 | -2.83480000 | -1.41910000 |
| H | -6.62550000 | -3.42300000 | -1.14260000 |
| C | -4.97070000 | -0.74720000 | 2.54200000  |
| C | -4.97160000 | -2.05700000 | 3.05670000  |
| C | -3.59050000 | -4.10430000 | 2.83500000  |
| H | -4.50610000 | -4.70910000 | 3.06520000  |
| C | -4.72350000 | -3.94230000 | 0.56240000  |
| H | -5.29670000 | -4.88330000 | 0.63510000  |
| H | -5.32700000 | -3.16830000 | 1.11720000  |
| C | -5.99480000 | -1.45980000 | -0.76060000 |
| H | -7.05610000 | -1.15100000 | -0.88600000 |
| C | -6.22490000 | -2.67440000 | 3.38850000  |
| H | -6.20620000 | -3.61300000 | 3.93840000  |
| C | -7.40580000 | -2.11610000 | 3.03120000  |
| H | -8.37170000 | -2.53780000 | 3.27550000  |
| C | -4.53290000 | -3.51750000 | -0.89220000 |
| H | -3.68120000 | -2.79300000 | -0.98900000 |
| H | -4.28260000 | -4.38650000 | -1.53480000 |
| C | -3.80380000 | 0.03620000  | 2.35090000  |
| H | -2.85040000 | -0.39250000 | 2.64520000  |
| C | -5.09900000 | 1.87310000  | 1.51530000  |
| C | -6.24200000 | -0.13070000 | 2.18380000  |
| C | -3.38460000 | -4.08070000 | 1.29660000  |
| H | -2.85820000 | -4.99250000 | 0.96810000  |
| H | -2.71320000 | -3.22030000 | 1.05560000  |
| C | -6.30320000 | 1.16410000  | 1.69850000  |
| H | -7.24860000 | 1.64140000  | 1.45940000  |
| C | -5.04840000 | -0.39750000 | -1.26640000 |
| H | -5.12360000 | 0.49440000  | -0.60480000 |
| H | -3.98460000 | -0.70810000 | -1.21690000 |
| C | -3.86600000 | 1.33770000  | 1.85340000  |
| H | -2.95910000 | 1.92750000  | 1.74710000  |
| C | -5.75010000 | -2.76960000 | -2.94410000 |
| H | -5.51230000 | -3.78450000 | -3.33820000 |
| H | -4.89150000 | -2.11400000 | -3.24710000 |
| C | -2.38450000 | -4.77460000 | 3.51340000  |
| H | -2.52300000 | -4.84610000 | 4.59770000  |
| H | -1.46490000 | -4.19890000 | 3.34530000  |
| H | -2.22050000 | -5.78760000 | 3.13670000  |
| C | -7.06040000 | -2.26870000 | -3.52220000 |
| H | -7.01900000 | -2.26780000 | -4.62320000 |
| H | -7.28650000 | -1.23320000 | -3.22500000 |
| H | -7.92230000 | -2.88800000 | -3.24270000 |
| H | -5.26110000 | -0.05890000 | -2.28360000 |
| H | -5.96042880 | -2.39417720 | -1.30111629 |
| H | -5.93451473 | -1.65495708 | 0.29990903  |

---

### Co-crystal CQ/CL

---

|   |             |             |             |
|---|-------------|-------------|-------------|
| O | 5.14400000  | -2.10000000 | -1.46080000 |
| O | 3.39030000  | -2.98090000 | -2.60270000 |
| O | 3.69710000  | -3.24630000 | 1.29790000  |
| H | 2.86240000  | -2.88790000 | 1.68270000  |
| O | 6.43050000  | -4.07670000 | 1.29250000  |
| H | 5.67500000  | -4.58600000 | 1.68310000  |
| O | 1.52160000  | 0.11150000  | -2.74300000 |
| O | 1.69990000  | 3.28440000  | -0.35990000 |
| O | 2.44500000  | 0.06780000  | 1.16400000  |
| O | 0.79930000  | 6.00540000  | -2.25180000 |
| H | 0.97910000  | 6.96440000  | -2.19000000 |
| O | -0.50150000 | 3.29990000  | -1.12420000 |
| O | -1.50210000 | 0.94980000  | -4.51140000 |
| O | -3.29880000 | 0.11690000  | -2.83160000 |
| H | -3.08640000 | 0.99430000  | -3.27160000 |
| O | -0.06630000 | -1.23480000 | -1.73200000 |
| N | 0.39100000  | 6.99570000  | 0.97520000  |
| C | 4.07300000  | -2.02770000 | -2.30010000 |

|   |             |             |             |
|---|-------------|-------------|-------------|
| C | 3.89810000  | -0.57220000 | -2.71380000 |
| H | 4.82880000  | -0.01280000 | -2.42320000 |
| C | 2.70320000  | 0.01280000  | -1.90920000 |
| H | 2.46510000  | -0.65450000 | -1.04270000 |
| C | 2.98520000  | 1.43790000  | -1.38240000 |
| H | 3.94090000  | 1.37780000  | -0.78350000 |
| C | 1.84260000  | 1.84470000  | -0.41340000 |
| H | 0.87400000  | 1.39790000  | -0.73720000 |
| C | 2.15330000  | 1.48850000  | 1.08580000  |
| C | 3.47910000  | 2.14100000  | 1.53240000  |
| H | 3.34280000  | 3.24170000  | 1.47650000  |
| H | 4.27600000  | 1.91360000  | 0.78460000  |
| C | 3.95640000  | 1.72400000  | 2.93130000  |
| H | 3.06600000  | 1.49100000  | 3.56690000  |
| C | 4.84960000  | 0.48060000  | 2.80080000  |
| C | 5.08310000  | -2.04080000 | 2.94120000  |
| H | 6.18600000  | -1.83140000 | 3.01640000  |
| C | 4.75660000  | -2.27310000 | 1.44210000  |
| H | 4.42780000  | -1.33070000 | 0.93940000  |
| C | 5.93770000  | -2.89480000 | 0.63620000  |
| C | 5.44020000  | -3.36980000 | -0.76850000 |
| H | 4.49120000  | -3.94880000 | -0.67840000 |
| C | 4.49890000  | -0.61770000 | 4.98640000  |
| H | 4.02190000  | -1.43930000 | 5.53550000  |
| H | 4.04050000  | 0.31110000  | 5.34490000  |
| H | 5.55690000  | -0.60320000 | 5.27750000  |
| C | 3.72960000  | -0.49290000 | -4.22720000 |
| H | 3.28000000  | 0.46690000  | -4.51740000 |
| H | 3.06610000  | -1.28260000 | -4.60550000 |
| H | 4.69070000  | -0.59240000 | -4.74430000 |
| C | 4.77560000  | -3.29320000 | 3.76420000  |
| H | 5.23300000  | -3.24560000 | 4.75800000  |
| H | 5.17900000  | -4.18920000 | 3.26440000  |
| H | 3.70030000  | -3.45450000 | 3.89110000  |
| C | 7.12540000  | -1.94800000 | 0.55230000  |
| H | 7.16530000  | -1.24780000 | 1.40420000  |
| H | 7.08630000  | -1.33470000 | -0.35750000 |
| H | 8.06740000  | -2.51230000 | 0.55060000  |
| C | 6.50600000  | -4.10650000 | -1.57430000 |
| H | 7.15450000  | -4.67820000 | -0.87240000 |
| H | 7.17110000  | -3.36890000 | -2.06660000 |
| C | 5.89670000  | -5.04570000 | -2.60860000 |
| H | 6.65960000  | -5.43840000 | -3.28830000 |
| H | 5.13420000  | -4.53620000 | -3.21580000 |
| H | 5.40300000  | -5.90250000 | -2.13480000 |
| C | 3.21120000  | 2.44200000  | -2.50750000 |
| H | 3.39060000  | 3.44740000  | -2.10290000 |
| H | 2.34370000  | 2.49110000  | -3.17970000 |
| H | 4.08260000  | 2.17550000  | -3.11590000 |
| C | 0.98610000  | 1.89620000  | 1.97570000  |
| H | 0.02420000  | 1.47570000  | 1.63900000  |
| H | 0.85640000  | 2.99580000  | 1.94890000  |
| H | 1.14220000  | 1.59610000  | 3.01750000  |
| C | 4.76780000  | 2.83330000  | 3.60360000  |
| H | 5.09960000  | 2.53980000  | 4.60620000  |
| H | 4.18200000  | 3.75280000  | 3.70630000  |
| H | 5.66960000  | 3.07340000  | 3.02180000  |
| C | 0.76970000  | 3.88470000  | -1.28310000 |
| H | 1.02540000  | 3.63020000  | -2.33740000 |
| C | 0.93600000  | 5.38690000  | -0.95730000 |
| H | 1.97720000  | 5.55930000  | -0.59060000 |
| C | -0.11820000 | 5.96250000  | 0.02490000  |
| H | -0.91890000 | 6.46220000  | -0.59080000 |
| C | -0.76060000 | 4.80800000  | 0.81270000  |
| H | -1.47950000 | 5.20500000  | 1.55700000  |
| H | 0.01030000  | 4.25300000  | 1.40040000  |
| C | -1.45340000 | 3.85830000  | -0.16110000 |

|    |             |             |             |
|----|-------------|-------------|-------------|
| H  | -2.18080000 | 4.39850000  | -0.81170000 |
| C  | -2.09540000 | 2.65630000  | 0.50470000  |
| H  | -2.60560000 | 2.02140000  | -0.22920000 |
| H  | -2.83730000 | 2.95530000  | 1.25940000  |
| H  | -1.35030000 | 2.02050000  | 1.01180000  |
| C  | 0.77660000  | 8.25100000  | 0.26500000  |
| H  | -0.07720000 | 8.61460000  | -0.32910000 |
| H  | 1.65830000  | 8.16900000  | -0.38620000 |
| H  | 0.98560000  | 9.02880000  | 1.02030000  |
| C  | 1.51170000  | 6.51840000  | 1.83510000  |
| H  | 1.16760000  | 5.65870000  | 2.43400000  |
| H  | 1.78120000  | 7.31560000  | 2.54700000  |
| H  | 2.41990000  | 6.21620000  | 1.29130000  |
| C  | 0.76390000  | -1.10670000 | -2.87570000 |
| H  | 1.41770000  | -2.01060000 | -2.78670000 |
| C  | 0.04890000  | -0.99640000 | -4.22320000 |
| H  | 0.07200000  | -2.00060000 | -4.69800000 |
| H  | 0.66250000  | -0.34920000 | -4.89430000 |
| C  | -1.38770000 | -0.46720000 | -4.22380000 |
| C  | -2.12250000 | -0.70840000 | -2.87380000 |
| H  | -2.51230000 | -1.74730000 | -2.80970000 |
| C  | -1.23640000 | -0.38090000 | -1.65030000 |
| H  | -0.89620000 | 0.68740000  | -1.66670000 |
| C  | -2.19630000 | -1.05900000 | -5.38490000 |
| H  | -1.74690000 | -0.78430000 | -6.34880000 |
| H  | -3.21630000 | -0.65240000 | -5.39080000 |
| H  | -2.25890000 | -2.14910000 | -5.33300000 |
| C  | -0.56640000 | 1.85570000  | -3.89320000 |
| H  | -0.84050000 | 2.81860000  | -4.33800000 |
| H  | 0.46670000  | 1.58130000  | -4.13790000 |
| H  | -0.70550000 | 1.86760000  | -2.79840000 |
| C  | -1.89360000 | -0.76010000 | -0.34040000 |
| H  | -1.29120000 | -0.46580000 | 0.52770000  |
| H  | -2.05310000 | -1.85330000 | -0.23900000 |
| H  | -2.88090000 | -0.27660000 | -0.22730000 |
| Cl | -4.56990000 | 2.68450000  | 3.34270000  |
| N  | -3.58660000 | -3.94570000 | 2.06810000  |
| H  | -3.31190000 | -4.54130000 | 2.85870000  |
| N  | -7.19200000 | -1.70080000 | 2.83610000  |
| H  | -7.83090000 | -1.33280000 | 3.55370000  |
| N  | -6.34660000 | -1.24510000 | -1.52000000 |
| H  | -7.19840000 | -1.84890000 | -1.40080000 |
| C  | -4.67790000 | -1.82170000 | 2.65390000  |
| C  | -4.78000000 | -3.20510000 | 2.43320000  |
| C  | -3.75970000 | -4.79550000 | 0.83890000  |
| H  | -4.71200000 | -5.38660000 | 0.86250000  |
| C  | -5.17070000 | -3.29720000 | -0.66100000 |
| H  | -5.86720000 | -4.09620000 | -0.97180000 |
| H  | -5.55620000 | -2.92250000 | 0.32840000  |
| C  | -6.22430000 | -0.39430000 | -0.24600000 |
| H  | -5.91550000 | -1.09170000 | 0.59270000  |
| H  | -7.23590000 | -0.02330000 | 0.03120000  |
| C  | -6.04210000 | -3.85820000 | 2.65280000  |
| H  | -6.06910000 | -4.94520000 | 2.62780000  |
| C  | -7.17260000 | -3.15130000 | 2.88530000  |
| H  | -8.13880000 | -3.60160000 | 3.07280000  |
| C  | -5.13210000 | -2.16450000 | -1.68480000 |
| H  | -4.20530000 | -1.54380000 | -1.56020000 |
| H  | -5.10510000 | -2.56440000 | -2.71990000 |
| C  | -3.45870000 | -1.09430000 | 2.62750000  |
| H  | -2.54230000 | -1.65120000 | 2.46060000  |
| C  | -4.60240000 | 0.95920000  | 3.09910000  |
| C  | -5.89100000 | -1.06010000 | 2.92810000  |
| C  | -3.77390000 | -3.88030000 | -0.41400000 |
| H  | -3.42940000 | -4.44150000 | -1.29900000 |
| H  | -3.03220000 | -3.06020000 | -0.24730000 |
| C  | -5.84720000 | 0.30180000  | 3.16870000  |

|   |             |             |             |
|---|-------------|-------------|-------------|
| H | -6.74150000 | 0.86980000  | 3.40630000  |
| C | -5.23430000 | 0.74070000  | -0.35860000 |
| H | -5.05960000 | 1.16950000  | 0.65340000  |
| H | -4.23740000 | 0.40660000  | -0.71390000 |
| C | -3.41860000 | 0.28040000  | 2.85390000  |
| H | -2.46960000 | 0.80890000  | 2.84840000  |
| C | -6.52620000 | -0.40830000 | -2.78540000 |
| H | -6.51400000 | -1.08840000 | -3.66830000 |
| H | -5.63350000 | 0.26180000  | -2.90240000 |
| C | -2.58090000 | -5.77890000 | 0.75600000  |
| H | -2.56870000 | -6.46410000 | 1.61050000  |
| H | -1.62040000 | -5.24750000 | 0.75660000  |
| H | -2.62610000 | -6.38760000 | -0.15100000 |
| C | -7.81700000 | 0.38800000  | -2.74750000 |
| H | -7.94820000 | 0.95100000  | -3.68560000 |
| H | -7.83120000 | 1.13520000  | -1.93940000 |
| H | -8.71000000 | -0.23970000 | -2.63270000 |
| H | -5.56890000 | 1.56180000  | -0.99800000 |
| O | 5.90330000  | 0.51730000  | 2.20320000  |
| C | 4.33350000  | -0.79430000 | 3.47490000  |
| H | 3.24420000  | -0.89470000 | 3.23130000  |
| C | 1.33490000  | -0.84950000 | 1.18350000  |
| H | 0.72610000  | -0.75040000 | 0.27220000  |
| H | 1.83400000  | -1.83310000 | 1.18980000  |
| H | 0.73590000  | -0.71810000 | 2.08820000  |
| H | -6.45924618 | -1.05578147 | -1.06675731 |

---

### Co-crystal CQ/ER

---

|   |             |             |             |
|---|-------------|-------------|-------------|
| O | 5.57140000  | -1.61570000 | -1.20060000 |
| O | 3.93010000  | -2.37420000 | -2.55980000 |
| O | 4.72540000  | -3.88960000 | 2.14640000  |
| H | 4.60130000  | -4.60700000 | 1.48270000  |
| O | 6.80780000  | -4.19570000 | 0.96540000  |
| H | 6.75600000  | -4.35070000 | 1.94580000  |
| O | 1.91740000  | 0.53380000  | -2.71850000 |
| O | 1.41000000  | 3.46140000  | 0.07930000  |
| O | 1.55220000  | -0.06950000 | 0.82050000  |
| O | 1.14270000  | 6.70750000  | -0.72760000 |
| H | 1.23320000  | 7.53040000  | -0.19450000 |
| O | -0.39330000 | 3.83460000  | -1.35660000 |
| O | -1.06690000 | 1.46470000  | -4.32280000 |
| O | -2.78610000 | 0.25120000  | -2.89760000 |
| H | -2.57180000 | 1.22800000  | -3.07310000 |
| O | 0.48760000  | -1.17640000 | -2.07410000 |
| N | -0.87890000 | 6.68630000  | 1.88600000  |
| C | 4.52680000  | -1.44330000 | -2.06600000 |
| C | 4.29390000  | 0.04880000  | -2.25020000 |
| H | 5.08660000  | 0.60080000  | -1.67520000 |
| C | 2.90830000  | 0.43620000  | -1.66410000 |
| H | 2.56390000  | -0.34580000 | -0.93540000 |
| C | 2.91920000  | 1.81750000  | -0.96210000 |
| H | 3.67050000  | 1.75670000  | -0.12670000 |
| C | 1.52770000  | 2.08170000  | -0.32820000 |
| H | 0.71620000  | 1.83380000  | -1.06330000 |
| C | 1.30660000  | 1.33660000  | 1.04050000  |
| C | 2.36290000  | 1.75440000  | 2.07990000  |
| H | 2.26850000  | 2.84990000  | 2.24150000  |
| H | 3.37370000  | 1.62380000  | 1.63640000  |
| C | 2.24920000  | 0.99440000  | 3.41510000  |
| H | 1.40180000  | 0.26230000  | 3.35080000  |
| C | 3.55000000  | 0.20650000  | 3.63270000  |
| C | 5.03990000  | -1.55820000 | 2.57340000  |
| H | 5.51360000  | -0.64420000 | 2.12640000  |
| C | 5.00920000  | -2.64530000 | 1.47400000  |
| H | 4.16970000  | -2.43650000 | 0.76940000  |

|   |             |             |             |
|---|-------------|-------------|-------------|
| C | 6.33550000  | -2.86870000 | 0.66000000  |
| C | 6.00600000  | -2.98480000 | -0.86100000 |
| H | 5.15650000  | -3.68310000 | -1.03400000 |
| C | 2.90030000  | -2.17770000 | 3.86810000  |
| H | 3.07370000  | -3.20040000 | 3.49220000  |
| H | 1.81820000  | -2.01910000 | 3.91350000  |
| H | 3.29330000  | -2.14680000 | 4.89080000  |
| C | 4.45000000  | 0.36880000  | -3.73530000 |
| H | 4.07300000  | 1.37660000  | -3.95790000 |
| H | 3.87430000  | -0.32280000 | -4.36490000 |
| H | 5.49840000  | 0.31890000  | -4.05050000 |
| C | 5.87120000  | -1.98970000 | 3.78100000  |
| H | 5.77890000  | -1.25090000 | 4.59210000  |
| H | 6.93560000  | -2.07240000 | 3.52640000  |
| H | 5.54090000  | -2.96200000 | 4.16810000  |
| C | 7.45440000  | -1.87520000 | 0.92870000  |
| H | 7.65070000  | -1.75630000 | 2.00610000  |
| H | 7.22250000  | -0.88850000 | 0.50820000  |
| H | 8.39580000  | -2.21730000 | 0.47910000  |
| C | 7.20550000  | -3.32610000 | -1.74120000 |
| H | 7.86160000  | -4.03510000 | -1.18620000 |
| H | 7.81140000  | -2.41380000 | -1.91310000 |
| C | 6.78500000  | -3.93980000 | -3.07160000 |
| H | 7.63980000  | -4.04250000 | -3.74880000 |
| H | 6.02630000  | -3.32910000 | -3.57950000 |
| H | 6.35180000  | -4.93880000 | -2.93670000 |
| C | 3.34720000  | 2.94030000  | -1.90250000 |
| H | 3.31290000  | 3.91360000  | -1.39300000 |
| H | 2.69880000  | 2.98770000  | -2.78650000 |
| H | 4.37600000  | 2.80470000  | -2.25390000 |
| C | -0.11930000 | 1.55170000  | 1.52380000  |
| H | -0.87950000 | 1.34280000  | 0.75290000  |
| H | -0.28050000 | 2.60570000  | 1.82050000  |
| H | -0.36650000 | 0.93090000  | 2.39910000  |
| C | 1.99200000  | 1.92990000  | 4.59410000  |
| H | 1.83510000  | 1.36540000  | 5.52170000  |
| H | 1.10370000  | 2.54840000  | 4.42960000  |
| H | 2.84970000  | 2.59360000  | 4.77150000  |
| C | 0.77410000  | 4.40200000  | -0.80970000 |
| H | 1.40820000  | 4.57910000  | -1.70780000 |
| C | 0.65280000  | 5.64030000  | 0.10750000  |
| H | 1.35150000  | 5.51450000  | 0.97220000  |
| C | -0.78780000 | 5.96260000  | 0.58320000  |
| H | -1.25760000 | 6.63790000  | -0.18690000 |
| C | -1.58750000 | 4.65220000  | 0.64750000  |
| H | -2.58850000 | 4.82630000  | 1.09260000  |
| H | -1.09320000 | 3.91490000  | 1.32630000  |
| C | -1.70680000 | 4.07840000  | -0.76030000 |
| H | -2.16400000 | 4.81370000  | -1.46480000 |
| C | -2.43090000 | 2.74420000  | -0.81790000 |
| H | -2.46080000 | 2.34270000  | -1.84160000 |
| H | -3.45880000 | 2.83870000  | -0.44370000 |
| H | -1.93910000 | 1.98510000  | -0.18030000 |
| C | -0.32550000 | 8.06820000  | 1.76840000  |
| H | -0.97610000 | 8.65050000  | 1.09370000  |
| H | 0.71070000  | 8.12640000  | 1.39570000  |
| H | -0.36390000 | 8.56550000  | 2.75150000  |
| C | -0.25040000 | 5.95570000  | 3.02300000  |
| H | -0.76770000 | 4.99070000  | 3.16260000  |
| H | -0.40660000 | 6.53100000  | 3.95050000  |
| H | 0.82670000  | 5.75850000  | 2.91420000  |
| C | 1.32290000  | -0.71200000 | -3.12450000 |
| H | 2.08380000  | -1.52920000 | -3.19060000 |
| C | 0.60850000  | -0.40770000 | -4.44190000 |
| H | 0.68530000  | -1.31210000 | -5.08230000 |
| H | 1.18530000  | 0.37880000  | -4.98290000 |
| C | -0.85760000 | 0.02980000  | -4.35970000 |



|    |             |             |             |
|----|-------------|-------------|-------------|
| C  | -1.59580000 | -0.52160000 | -3.10040000 |
| H  | -1.96000000 | -1.55670000 | -3.25960000 |
| C  | -0.72480000 | -0.42250000 | -1.82960000 |
| H  | -0.43390000 | 0.64410000  | -1.62790000 |
| C  | -1.62180000 | -0.35210000 | -5.63240000 |
| H  | -1.17090000 | 0.12550000  | -6.51280000 |
| H  | -2.65680000 | 0.01220000  | -5.58080000 |
| H  | -1.64080000 | -1.43180000 | -5.79910000 |
| C  | -0.08630000 | 2.29010000  | -3.66440000 |
| H  | -0.56580000 | 3.27770000  | -3.65580000 |
| H  | 0.84490000  | 2.29840000  | -4.23690000 |
| H  | 0.10460000  | 1.94700000  | -2.62940000 |
| C  | -1.34120000 | -1.10110000 | -0.62290000 |
| H  | -0.71340000 | -0.98120000 | 0.27820000  |
| H  | -1.44230000 | -2.18600000 | -0.76550000 |
| H  | -2.33970000 | -0.68650000 | -0.38440000 |
| Cl | -3.13930000 | 2.17740000  | 2.42320000  |
| N  | -4.18480000 | -4.55680000 | 2.28870000  |
| H  | -4.29290000 | -5.14460000 | 3.12280000  |
| N  | -6.96710000 | -1.24560000 | 2.33410000  |
| H  | -7.48890000 | -0.62610000 | 2.96880000  |
| N  | -5.76630000 | -1.71260000 | -2.01400000 |
| H  | -6.66360000 | -2.25860000 | -2.05740000 |
| C  | -4.60640000 | -2.14070000 | 2.40780000  |
| C  | -5.11630000 | -3.44900000 | 2.36380000  |
| C  | -4.35210000 | -5.39830000 | 1.05340000  |
| H  | -5.41170000 | -5.73420000 | 0.91030000  |
| C  | -5.09920000 | -3.77110000 | -0.75130000 |
| H  | -5.82530000 | -4.45890000 | -1.22000000 |
| H  | -5.62790000 | -3.29350000 | 0.11860000  |
| C  | -5.91250000 | -0.70810000 | -0.86030000 |
| H  | -5.93420000 | -1.29610000 | 0.10750000  |
| H  | -6.90750000 | -0.21910000 | -0.94260000 |
| C  | -6.53230000 | -3.65750000 | 2.48690000  |
| H  | -6.89620000 | -4.67980000 | 2.56060000  |
| C  | -7.40060000 | -2.61930000 | 2.51470000  |
| H  | -8.47160000 | -2.73080000 | 2.62610000  |
| C  | -4.62870000 | -2.70160000 | -1.73690000 |
| H  | -3.75510000 | -2.13880000 | -1.31920000 |
| H  | -4.28660000 | -3.16050000 | -2.68780000 |
| C  | -3.22140000 | -1.82500000 | 2.41350000  |
| H  | -2.51400000 | -2.64980000 | 2.43180000  |
| C  | -3.69720000 | 0.52230000  | 2.46840000  |
| C  | -5.53620000 | -1.02010000 | 2.45580000  |
| C  | -3.91620000 | -4.56570000 | -0.18230000 |
| H  | -3.48380000 | -5.22170000 | -0.95590000 |
| H  | -3.10700000 | -3.87590000 | 0.14270000  |
| C  | -5.08570000 | 0.28780000  | 2.51370000  |
| H  | -5.77160000 | 1.12540000  | 2.59370000  |
| C  | -4.80300000 | 0.31550000  | -0.81410000 |
| H  | -4.88090000 | 0.90830000  | 0.12000000  |
| H  | -3.79170000 | -0.14010000 | -0.77190000 |
| C  | -2.77010000 | -0.50820000 | 2.45350000  |
| H  | -1.70230000 | -0.29550000 | 2.48920000  |
| C  | -5.56240000 | -1.04010000 | -3.36970000 |
| H  | -5.33500000 | -1.82300000 | -4.12800000 |
| H  | -4.64600000 | -0.38140000 | -3.31970000 |
| C  | -3.46300000 | -6.64390000 | 1.19570000  |
| H  | -3.77820000 | -7.26730000 | 2.03930000  |
| H  | -2.41820000 | -6.36180000 | 1.38150000  |
| H  | -3.49100000 | -7.26590000 | 0.29760000  |
| C  | -6.78470000 | -0.24110000 | -3.78060000 |
| H  | -6.63160000 | 0.20480000  | -4.77700000 |
| H  | -6.98860000 | 0.60010000  | -3.10120000 |
| H  | -7.69770000 | -0.84600000 | -3.84690000 |
| H  | -4.81230000 | 1.01500000  | -1.65620000 |
| O  | 4.47270000  | 0.65600000  | 4.27470000  |

|   |             |             |             |
|---|-------------|-------------|-------------|
| C | 3.58830000  | -1.16380000 | 2.95430000  |
| H | 2.98650000  | -1.08990000 | 2.00200000  |
| H | 0.78430000  | -0.51720000 | 0.38070000  |
| H | -5.98866452 | -1.46695471 | -1.62498195 |

---

Co-crystal HQ/AZ

---

|   |             |             |             |
|---|-------------|-------------|-------------|
| O | 6.31880000  | -1.29690000 | -0.99920000 |
| O | 4.53930000  | -2.68090000 | -0.80590000 |
| O | 5.52360000  | -2.63550000 | 2.28660000  |
| H | 4.97690000  | -3.08370000 | 1.59650000  |
| O | 8.08470000  | -2.12520000 | 2.09210000  |
| H | 7.54530000  | -2.80770000 | 2.57890000  |
| O | 1.92680000  | -0.69750000 | -2.26740000 |
| O | 1.32080000  | 3.18990000  | -0.84430000 |
| O | 1.64290000  | 0.07640000  | 0.98090000  |
| H | 0.91360000  | -0.46610000 | 0.58440000  |
| O | 0.86570000  | 5.96610000  | -2.65530000 |
| H | 0.89870000  | 6.92930000  | -2.44800000 |
| O | -0.59170000 | 3.01350000  | -2.17440000 |
| O | -0.85860000 | -1.30800000 | -4.30250000 |
| O | -2.68020000 | -1.77980000 | -2.55230000 |
| H | -2.55220000 | -1.11840000 | -3.30150000 |
| O | 0.57130000  | -1.92070000 | -0.84420000 |
| N | 4.21130000  | 0.10290000  | 3.01580000  |
| N | -1.05040000 | 6.81550000  | -0.12620000 |
| C | 5.02610000  | -1.66270000 | -1.25240000 |
| C | 4.38120000  | -0.59060000 | -2.11320000 |
| H | 5.06770000  | 0.30070000  | -2.12790000 |
| C | 3.02410000  | -0.15430000 | -1.48770000 |
| H | 2.93480000  | -0.53060000 | -0.43050000 |
| C | 2.82950000  | 1.38120000  | -1.51040000 |
| H | 3.67050000  | 1.84110000  | -0.92880000 |
| C | 1.50160000  | 1.75590000  | -0.80040000 |
| H | 0.64450000  | 1.25390000  | -1.30330000 |
| C | 1.47150000  | 1.48690000  | 0.75460000  |
| C | 2.67180000  | 2.13440000  | 1.46850000  |
| H | 2.73690000  | 3.19180000  | 1.14610000  |
| H | 3.59360000  | 1.63530000  | 1.09720000  |
| C | 2.63250000  | 2.02310000  | 3.00710000  |
| H | 1.81310000  | 1.31120000  | 3.28820000  |
| C | 3.96260000  | 1.46190000  | 3.58380000  |
| H | 4.80280000  | 2.12960000  | 3.30080000  |
| H | 3.91430000  | 1.46390000  | 4.69340000  |
| C | 5.63450000  | -0.34310000 | 3.09690000  |
| H | 6.28450000  | 0.56230000  | 2.92290000  |
| C | 5.80060000  | -1.28050000 | 1.86610000  |
| H | 5.05790000  | -0.97600000 | 1.09160000  |
| C | 7.22900000  | -1.34630000 | 1.24560000  |
| C | 7.14860000  | -2.13120000 | -0.10870000 |
| H | 6.64650000  | -3.11290000 | 0.04010000  |
| C | 3.23270000  | -0.90160000 | 3.51550000  |
| H | 3.56550000  | -1.92190000 | 3.26190000  |
| H | 2.28010000  | -0.72420000 | 2.97380000  |
| H | 3.04790000  | -0.86210000 | 4.59690000  |
| C | 4.26670000  | -1.13260000 | -3.53680000 |
| H | 3.59880000  | -0.49740000 | -4.13650000 |
| H | 3.84280000  | -2.14430000 | -3.55880000 |
| H | 5.24380000  | -1.16440000 | -4.03290000 |
| C | 6.07680000  | -1.00750000 | 4.39950000  |
| H | 5.83360000  | -0.39150000 | 5.26930000  |
| H | 7.15920000  | -1.18810000 | 4.39530000  |
| H | 5.59190000  | -1.98500000 | 4.53410000  |
| C | 7.90370000  | 0.00720000  | 1.08910000  |
| H | 7.73140000  | 0.65090000  | 1.96440000  |
| H | 7.54020000  | 0.53240000  | 0.19730000  |

|    |             |             |             |
|----|-------------|-------------|-------------|
| H  | 8.99250000  | -0.11410000 | 1.00150000  |
| C  | 8.48850000  | -2.27480000 | -0.82240000 |
| H  | 9.27360000  | -2.46700000 | -0.05620000 |
| H  | 8.75680000  | -1.31320000 | -1.30650000 |
| C  | 8.47440000  | -3.39390000 | -1.85740000 |
| H  | 9.43360000  | -3.45430000 | -2.38470000 |
| H  | 7.69360000  | -3.23320000 | -2.61050000 |
| H  | 8.29360000  | -4.37270000 | -1.39710000 |
| C  | 2.88830000  | 1.91420000  | -2.94230000 |
| H  | 2.69700000  | 2.99760000  | -2.97720000 |
| H  | 2.14380000  | 1.41800000  | -3.57870000 |
| H  | 3.87260000  | 1.75440000  | -3.39440000 |
| C  | 0.11440000  | 1.91680000  | 1.30890000  |
| H  | -0.72250000 | 1.40610000  | 0.80650000  |
| H  | -0.04020000 | 3.00010000  | 1.16080000  |
| H  | 0.03570000  | 1.70060000  | 2.38120000  |
| C  | 2.33850000  | 3.38150000  | 3.65630000  |
| H  | 2.23310000  | 3.29340000  | 4.74280000  |
| H  | 1.40200000  | 3.80260000  | 3.27310000  |
| H  | 3.13060000  | 4.11080000  | 3.45900000  |
| C  | 0.57480000  | 3.76120000  | -1.93860000 |
| H  | 1.14720000  | 3.64640000  | -2.89170000 |
| C  | 0.45080000  | 5.23350000  | -1.48510000 |
| H  | 1.19180000  | 5.42300000  | -0.66920000 |
| C  | -0.98000000 | 5.65850000  | -1.06780000 |
| H  | -1.53100000 | 5.97380000  | -1.99850000 |
| C  | -1.68570000 | 4.43450000  | -0.46400000 |
| H  | -2.66740000 | 4.72320000  | -0.03110000 |
| H  | -1.09860000 | 4.01670000  | 0.38700000  |
| C  | -1.86570000 | 3.38030000  | -1.55250000 |
| H  | -2.44750000 | 3.78140000  | -2.41660000 |
| C  | -2.46540000 | 2.07970000  | -1.04800000 |
| H  | -2.63140000 | 1.37370000  | -1.86920000 |
| H  | -3.43240000 | 2.25900000  | -0.55400000 |
| H  | -1.80870000 | 1.58800000  | -0.30960000 |
| C  | -0.60740000 | 8.07500000  | -0.79460000 |
| H  | -1.34820000 | 8.33710000  | -1.56980000 |
| H  | 0.39060000  | 8.02810000  | -1.26410000 |
| H  | -0.60580000 | 8.90150000  | -0.06590000 |
| C  | -0.30810000 | 6.59810000  | 1.14780000  |
| H  | -0.74240000 | 5.73030000  | 1.67300000  |
| H  | -0.45940000 | 7.47030000  | 1.80470000  |
| H  | 0.77350000  | 6.42930000  | 1.03570000  |
| C  | 1.50610000  | -2.02300000 | -1.90820000 |
| H  | 2.33470000  | -2.60580000 | -1.43510000 |
| C  | 0.95220000  | -2.64540000 | -3.19220000 |
| H  | 1.18530000  | -3.73100000 | -3.16730000 |
| H  | 1.52630000  | -2.24310000 | -4.05870000 |
| C  | -0.54070000 | -2.45710000 | -3.47460000 |
| C  | -1.39800000 | -2.31020000 | -2.18080000 |
| H  | -1.62710000 | -3.29940000 | -1.73060000 |
| C  | -0.73910000 | -1.37070000 | -1.14950000 |
| H  | -0.59270000 | -0.34580000 | -1.58160000 |
| C  | -1.08580000 | -3.59520000 | -4.34570000 |
| H  | -0.56870000 | -3.62480000 | -5.31410000 |
| H  | -2.14990000 | -3.43520000 | -4.56670000 |
| H  | -0.97760000 | -4.57200000 | -3.86690000 |
| C  | -0.16100000 | -0.06690000 | -4.07320000 |
| H  | -0.60210000 | 0.59400000  | -4.82770000 |
| H  | 0.91710000  | -0.19210000 | -4.23120000 |
| H  | -0.34620000 | 0.30970000  | -3.05480000 |
| C  | -1.42220000 | -1.33140000 | 0.20080000  |
| H  | -0.71580000 | -1.00970000 | 0.98810000  |
| H  | -1.80130000 | -2.31540000 | 0.54100000  |
| H  | -2.27760000 | -0.64340000 | 0.22530000  |
| Cl | -4.89540000 | 3.67800000  | 1.41250000  |
| N  | -3.56880000 | -2.78290000 | 3.10430000  |

|   |             |             |             |
|---|-------------|-------------|-------------|
| H | -3.27240000 | -2.72030000 | 4.08760000  |
| N | -7.30930000 | -0.74550000 | 2.39860000  |
| H | -8.06790000 | -0.17600000 | 2.79700000  |
| N | -5.87290000 | -2.68040000 | -1.28470000 |
| H | -6.75270000 | -3.20660000 | -1.05840000 |
| O | -5.51350000 | 0.40010000  | -1.91660000 |
| H | -6.02890000 | 1.14950000  | -1.54300000 |
| C | -4.79800000 | -0.71070000 | 2.63890000  |
| C | -4.83370000 | -2.08220000 | 2.96100000  |
| C | -3.58440000 | -4.22160000 | 2.67540000  |
| H | -4.53050000 | -4.74700000 | 2.97140000  |
| C | -4.80050000 | -4.18740000 | 0.42990000  |
| H | -5.28280000 | -5.18080000 | 0.39870000  |
| H | -5.46300000 | -3.54770000 | 1.07110000  |
| C | -5.84850000 | -1.44690000 | -0.38860000 |
| H | -6.88310000 | -1.04500000 | -0.27240000 |
| C | -6.09670000 | -2.68720000 | 3.27330000  |
| H | -6.09580000 | -3.68780000 | 3.70290000  |
| C | -7.26670000 | -2.04410000 | 3.04480000  |
| H | -8.23870000 | -2.45610000 | 3.28240000  |
| C | -4.68250000 | -3.59310000 | -0.97590000 |
| H | -3.74330000 | -2.98570000 | -1.07690000 |
| H | -4.62180000 | -4.38860000 | -1.74690000 |
| C | -3.61030000 | 0.05250000  | 2.51770000  |
| H | -2.66420000 | -0.43070000 | 2.74100000  |
| C | -4.85490000 | 2.01250000  | 1.91500000  |
| C | -6.05580000 | -0.01130000 | 2.39960000  |
| C | -3.43920000 | -4.28250000 | 1.13060000  |
| H | -2.92030000 | -5.20840000 | 0.83020000  |
| H | -2.77410000 | -3.43750000 | 0.82070000  |
| C | -6.08090000 | 1.32860000  | 2.05760000  |
| H | -7.01330000 | 1.86280000  | 1.90260000  |
| C | -4.89890000 | -0.35150000 | -0.85920000 |
| H | -4.63840000 | 0.31850000  | -0.00860000 |
| H | -3.96120000 | -0.74490000 | -1.31270000 |
| C | -3.63690000 | 1.40510000  | 2.16950000  |
| H | -2.71090000 | 1.97190000  | 2.10770000  |
| C | -5.89810000 | -2.30970000 | -2.76760000 |
| H | -4.84820000 | -2.13540000 | -3.12000000 |
| H | -6.40300000 | -1.31260000 | -2.88490000 |
| C | -2.40440000 | -4.94850000 | 3.34070000  |
| H | -2.50030000 | -4.95460000 | 4.43230000  |
| H | -1.45000000 | -4.46010000 | 3.10460000  |
| H | -2.33670000 | -5.99000000 | 3.01420000  |
| C | -6.59300000 | -3.38080000 | -3.58480000 |
| H | -6.59110000 | -3.10040000 | -4.65190000 |
| H | -7.64740000 | -3.51580000 | -3.30930000 |
| H | -6.09860000 | -4.35900000 | -3.52560000 |
| H | -5.75638776 | -1.66901342 | 0.66429171  |
| H | -5.77351762 | -2.39305966 | -1.69805318 |

---

#### Co-crystal HQ/CL

---

|   |             |             |             |
|---|-------------|-------------|-------------|
| O | 5.31360000  | -2.14700000 | -1.29460000 |
| O | 3.55950000  | -3.24390000 | -2.22920000 |
| O | 4.03410000  | -2.98900000 | 1.65240000  |
| H | 3.18920000  | -2.61190000 | 1.99230000  |
| O | 6.80180000  | -3.69080000 | 1.62860000  |
| H | 6.08750000  | -4.18070000 | 2.11010000  |
| O | 1.54470000  | -0.28120000 | -2.73230000 |
| O | 1.65390000  | 3.18380000  | -0.75840000 |
| O | 2.60050000  | 0.21150000  | 1.10040000  |
| O | 0.58170000  | 5.63440000  | -2.90130000 |
| H | 0.69640000  | 6.60440000  | -2.94690000 |
| O | -0.56960000 | 3.01460000  | -1.43240000 |
| O | -1.54530000 | 0.22870000  | -4.46460000 |

|   |             |             |             |
|---|-------------|-------------|-------------|
| O | -3.24470000 | -0.42160000 | -2.63410000 |
| H | -3.06520000 | 0.40190000  | -3.18400000 |
| O | 0.06250000  | -1.57120000 | -1.50950000 |
| N | 0.18520000  | 6.97090000  | 0.19420000  |
| C | 4.20690000  | -2.23080000 | -2.08600000 |
| C | 3.94970000  | -0.85250000 | -2.68000000 |
| H | 4.85850000  | -0.21750000 | -2.49340000 |
| C | 2.74650000  | -0.21950000 | -1.92500000 |
| H | 2.55670000  | -0.77560000 | -0.97250000 |
| C | 2.97650000  | 1.27390000  | -1.59960000 |
| H | 3.95510000  | 1.33650000  | -1.03970000 |
| C | 1.85200000  | 1.75440000  | -0.64370000 |
| H | 0.89220000  | 1.23560000  | -0.87180000 |
| C | 2.23100000  | 1.59900000  | 0.87420000  |
| C | 3.53520000  | 2.36410000  | 1.18370000  |
| H | 3.34100000  | 3.44120000  | 0.99410000  |
| H | 4.31750000  | 2.08060000  | 0.43960000  |
| C | 4.07940000  | 2.15280000  | 2.60410000  |
| H | 3.22440000  | 1.95760000  | 3.29810000  |
| C | 5.03630000  | 0.95080000  | 2.59640000  |
| C | 5.41890000  | -1.51360000 | 3.05750000  |
| H | 6.51060000  | -1.24140000 | 3.05380000  |
| C | 5.04760000  | -1.95830000 | 1.61800000  |
| H | 4.65280000  | -1.10710000 | 1.01070000  |
| C | 6.22680000  | -2.62740000 | 0.84820000  |
| C | 5.69960000  | -3.30190000 | -0.46070000 |
| H | 4.78520000  | -3.90640000 | -0.25480000 |
| C | 4.84350000  | 0.14110000  | 4.92270000  |
| H | 4.44290000  | -0.62400000 | 5.59960000  |
| H | 4.34580000  | 1.08340000  | 5.17880000  |
| H | 5.91060000  | 0.25270000  | 5.15390000  |
| C | 3.74270000  | -0.98210000 | -4.18530000 |
| H | 3.23910000  | -0.09070000 | -4.58500000 |
| H | 3.11040000  | -1.84410000 | -4.43780000 |
| H | 4.69530000  | -1.10410000 | -4.71300000 |
| C | 5.21320000  | -2.65980000 | 4.04960000  |
| H | 5.69540000  | -2.45380000 | 5.01070000  |
| H | 5.65630000  | -3.58990000 | 3.65740000  |
| H | 4.15380000  | -2.86370000 | 4.23490000  |
| C | 7.36230000  | -1.64820000 | 0.59150000  |
| H | 7.39950000  | -0.84170000 | 1.34350000  |
| H | 7.25840000  | -1.16120000 | -0.38720000 |
| H | 8.33030000  | -2.16580000 | 0.62090000  |
| C | 6.76870000  | -4.08830000 | -1.21330000 |
| H | 7.47190000  | -4.53520000 | -0.47460000 |
| H | 7.37630000  | -3.39150000 | -1.82500000 |
| C | 6.16710000  | -5.17930000 | -2.09140000 |
| H | 6.92130000  | -5.62150000 | -2.75010000 |
| H | 5.35660000  | -4.78670000 | -2.72300000 |
| H | 5.73610000  | -5.98920000 | -1.49100000 |
| C | 3.11030000  | 2.12900000  | -2.85510000 |
| H | 3.25040000  | 3.18670000  | -2.59420000 |
| H | 2.21900000  | 2.04560000  | -3.49200000 |
| H | 3.97310000  | 1.82550000  | -3.45850000 |
| C | 1.07460000  | 2.05520000  | 1.75380000  |
| H | 0.12570000  | 1.54920000  | 1.51040000  |
| H | 0.88380000  | 3.13520000  | 1.59440000  |
| H | 1.28180000  | 1.90030000  | 2.81790000  |
| C | 4.84920000  | 3.37870000  | 3.10010000  |
| H | 5.23060000  | 3.23220000  | 4.11710000  |
| H | 4.21620000  | 4.27220000  | 3.11080000  |
| H | 5.71570000  | 3.58990000  | 2.45660000  |
| C | 0.66340000  | 3.63660000  | -1.70380000 |
| H | 0.89670000  | 3.28020000  | -2.73330000 |
| C | 0.76830000  | 5.17150000  | -1.54950000 |
| H | 1.80770000  | 5.42780000  | -1.22920000 |
| C | -0.29140000 | 5.80760000  | -0.61190000 |

|    |             |             |             |
|----|-------------|-------------|-------------|
| H  | -1.13180000 | 6.18990000  | -1.25800000 |
| C  | -0.85340000 | 4.72500000  | 0.32510000  |
| H  | -1.57280000 | 5.17240000  | 1.04020000  |
| H  | -0.04090000 | 4.28070000  | 0.94910000  |
| C  | -1.52250000 | 3.63590000  | -0.50910000 |
| H  | -2.29520000 | 4.05950000  | -1.19350000 |
| C  | -2.08260000 | 2.48960000  | 0.31140000  |
| H  | -2.58360000 | 1.75560000  | -0.33220000 |
| H  | -2.81610000 | 2.84060000  | 1.05210000  |
| H  | -1.29200000 | 1.95000000  | 0.85890000  |
| C  | 0.48590000  | 8.15030000  | -0.67020000 |
| H  | -0.40210000 | 8.39960000  | -1.27320000 |
| H  | 1.35190000  | 8.03390000  | -1.33700000 |
| H  | 0.67570000  | 9.02130000  | -0.01870000 |
| C  | 1.35030000  | 6.65570000  | 1.06970000  |
| H  | 1.06580000  | 5.85930000  | 1.77730000  |
| H  | 1.59600000  | 7.54520000  | 1.67260000  |
| H  | 2.25890000  | 6.33430000  | 0.53780000  |
| C  | 0.84480000  | -1.54030000 | -2.69100000 |
| H  | 1.54690000  | -2.39560000 | -2.52460000 |
| C  | 0.07550000  | -1.62360000 | -4.00970000 |
| H  | 0.11240000  | -2.67930000 | -4.35360000 |
| H  | 0.63920000  | -1.05010000 | -4.78330000 |
| C  | -1.37650000 | -1.13900000 | -4.01270000 |
| C  | -2.05800000 | -1.23240000 | -2.61580000 |
| H  | -2.43370000 | -2.26040000 | -2.41920000 |
| C  | -1.13860000 | -0.75660000 | -1.46990000 |
| H  | -0.84020000 | 0.31580000  | -1.60820000 |
| C  | -2.20880000 | -1.88880000 | -5.06050000 |
| H  | -1.80450000 | -1.72080000 | -6.06790000 |
| H  | -3.24050000 | -1.51260000 | -5.07340000 |
| H  | -2.23530000 | -2.96570000 | -4.87540000 |
| C  | -0.62540000 | 1.23040000  | -3.98560000 |
| H  | -0.95760000 | 2.12880000  | -4.51750000 |
| H  | 0.40780000  | 0.96970000  | -4.24440000 |
| H  | -0.72220000 | 1.35540000  | -2.89360000 |
| C  | -1.70810000 | -1.02620000 | -0.09240000 |
| H  | -0.92780000 | -0.93060000 | 0.67890000  |
| H  | -2.11320000 | -2.05150000 | 0.02510000  |
| H  | -2.51570000 | -0.33160000 | 0.16910000  |
| Cl | -4.29320000 | 3.16380000  | 3.37480000  |
| N  | -3.59880000 | -3.54560000 | 2.42110000  |
| H  | -3.25930000 | -3.94330000 | 3.30690000  |
| N  | -7.11650000 | -1.10900000 | 3.01710000  |
| H  | -7.74970000 | -0.68160000 | 3.70640000  |
| N  | -6.35090000 | -1.53300000 | -1.26840000 |
| H  | -7.25180000 | -2.04650000 | -1.10310000 |
| O  | -5.82150000 | 1.55200000  | -0.77350000 |
| H  | -6.20200000 | 2.10890000  | -0.05820000 |
| C  | -4.60860000 | -1.35730000 | 2.88670000  |
| C  | -4.77680000 | -2.74300000 | 2.70010000  |
| C  | -3.80930000 | -4.65130000 | 1.42610000  |
| H  | -4.76720000 | -5.20750000 | 1.60200000  |
| C  | -5.25640000 | -3.64280000 | -0.41850000 |
| H  | -5.82220000 | -4.53460000 | -0.74380000 |
| H  | -5.78170000 | -3.27010000 | 0.49970000  |
| C  | -6.05960000 | -0.72990000 | -0.00520000 |
| H  | -7.01980000 | -0.37760000 | 0.44410000  |
| C  | -6.06830000 | -3.32370000 | 2.93510000  |
| H  | -6.14730000 | -4.40910000 | 2.96030000  |
| C  | -7.16780000 | -2.55560000 | 3.12210000  |
| H  | -8.15530000 | -2.95230000 | 3.31910000  |
| C  | -5.25320000 | -2.57210000 | -1.51250000 |
| H  | -4.26730000 | -2.03620000 | -1.54700000 |
| H  | -5.39460000 | -3.02290000 | -2.51690000 |
| C  | -3.35620000 | -0.69400000 | 2.86730000  |
| H  | -2.46150000 | -1.29670000 | 2.74910000  |

|   |             |             |             |
|---|-------------|-------------|-------------|
| C | -4.40530000 | 1.43430000  | 3.21590000  |
| C | -5.78840000 | -0.52710000 | 3.10430000  |
| C | -3.83540000 | -4.04280000 | -0.00130000 |
| H | -3.41000000 | -4.75320000 | -0.73030000 |
| H | -3.15710000 | -3.15210000 | -0.00140000 |
| C | -5.68340000 | 0.84050000  | 3.28200000  |
| H | -6.55320000 | 1.46130000  | 3.47410000  |
| C | -5.10700000 | 0.44310000  | -0.20800000 |
| H | -4.65060000 | 0.73430000  | 0.76560000  |
| H | -4.30010000 | 0.23390000  | -0.94690000 |
| C | -3.25230000 | 0.68780000  | 3.03930000  |
| H | -2.27640000 | 1.16590000  | 3.04210000  |
| C | -6.52400000 | -0.63520000 | -2.49370000 |
| H | -5.51380000 | -0.39440000 | -2.91720000 |
| H | -6.93630000 | 0.35660000  | -2.16250000 |
| C | -2.64610000 | -5.64870000 | 1.55140000  |
| H | -2.62380000 | -6.11900000 | 2.54060000  |
| H | -1.67780000 | -5.15140000 | 1.40950000  |
| H | -2.72140000 | -6.45020000 | 0.81110000  |
| C | -7.42250000 | -1.28880000 | -3.52490000 |
| H | -7.52730000 | -0.62980000 | -4.40360000 |
| H | -8.44160000 | -1.46690000 | -3.15680000 |
| H | -7.02670000 | -2.24020000 | -3.90310000 |
| C | 4.62290000  | -0.24630000 | 3.45830000  |
| H | 3.53240000  | -0.43490000 | 3.28610000  |
| O | 6.06140000  | 0.96040000  | 1.95020000  |
| C | 1.54940000  | -0.73390000 | 1.36700000  |
| H | 0.79320000  | -0.73560000 | 0.56510000  |
| H | 2.08590000  | -1.69800000 | 1.37100000  |
| H | 1.09650000  | -0.53790000 | 2.34270000  |
| H | -5.80787841 | -1.33810786 | 0.85102394  |
| H | -5.95373861 | -1.75140482 | -1.55838099 |

---

### Co-crystal HQ/ER

---

|   |             |             |             |
|---|-------------|-------------|-------------|
| O | 6.07640000  | -0.96530000 | -1.07530000 |
| O | 4.33100000  | -2.18730000 | -1.81740000 |
| O | 4.35910000  | -3.03240000 | 1.06990000  |
| H | 4.08450000  | -2.96080000 | 0.12110000  |
| O | 7.11160000  | -2.99010000 | 1.77830000  |
| H | 6.43700000  | -3.70230000 | 1.94820000  |
| O | 1.99710000  | 0.22970000  | -2.70100000 |
| O | 1.03340000  | 3.46650000  | -0.40980000 |
| O | 1.80310000  | 0.16690000  | 0.89680000  |
| H | 1.12090000  | -0.41710000 | 0.46370000  |
| O | 0.06290000  | 6.29090000  | -2.03880000 |
| H | 0.04980000  | 7.23980000  | -1.80320000 |
| O | -0.95330000 | 3.22890000  | -1.60010000 |
| O | -1.10750000 | 0.20920000  | -4.51950000 |
| O | -2.67300000 | -0.93300000 | -2.81560000 |
| H | -2.67090000 | -0.05760000 | -3.31540000 |
| O | 0.76670000  | -1.41060000 | -1.62280000 |
| N | -1.29750000 | 6.67330000  | 1.03530000  |
| C | 4.89880000  | -1.11270000 | -1.73670000 |
| C | 4.42730000  | 0.23310000  | -2.26230000 |
| H | 5.12500000  | 1.02670000  | -1.87910000 |
| C | 3.00530000  | 0.50330000  | -1.69570000 |
| H | 2.81190000  | -0.17080000 | -0.81640000 |
| C | 2.78830000  | 1.97070000  | -1.26100000 |
| H | 3.57410000  | 2.21430000  | -0.49120000 |
| C | 1.40060000  | 2.07950000  | -0.57380000 |
| H | 0.62320000  | 1.55410000  | -1.18260000 |
| C | 1.39230000  | 1.55130000  | 0.90720000  |
| C | 2.44200000  | 2.27090000  | 1.77210000  |
| H | 2.12500000  | 3.32920000  | 1.87990000  |
| H | 3.41340000  | 2.32120000  | 1.22760000  |

|   |             |             |             |
|---|-------------|-------------|-------------|
| C | 2.65080000  | 1.62040000  | 3.14920000  |
| H | 1.71350000  | 1.08310000  | 3.44340000  |
| C | 3.81650000  | 0.62480000  | 3.05810000  |
| C | 4.72760000  | -1.74030000 | 3.05100000  |
| H | 5.63000000  | -1.25650000 | 3.51660000  |
| C | 4.96610000  | -1.80540000 | 1.51680000  |
| H | 4.49290000  | -0.94400000 | 0.99640000  |
| C | 6.48260000  | -1.86690000 | 1.13750000  |
| C | 6.65780000  | -2.14310000 | -0.39120000 |
| H | 6.09240000  | -3.05480000 | -0.69040000 |
| C | 3.05420000  | -0.95010000 | 4.82000000  |
| H | 2.69090000  | -1.96140000 | 5.04520000  |
| H | 2.22940000  | -0.26470000 | 5.04910000  |
| H | 3.87510000  | -0.73400000 | 5.51390000  |
| C | 4.49320000  | 0.21450000  | -3.78640000 |
| H | 3.97990000  | 1.09190000  | -4.20500000 |
| H | 3.99210000  | -0.66720000 | -4.20670000 |
| H | 5.52880000  | 0.22100000  | -4.14530000 |
| C | 4.58590000  | -3.15240000 | 3.62210000  |
| H | 4.58340000  | -3.15620000 | 4.71520000  |
| H | 5.42340000  | -3.78640000 | 3.28910000  |
| H | 3.66600000  | -3.63490000 | 3.26460000  |
| C | 7.24320000  | -0.63230000 | 1.59220000  |
| H | 6.81320000  | -0.19670000 | 2.51220000  |
| H | 7.21570000  | 0.16070000  | 0.83430000  |
| H | 8.29000000  | -0.87740000 | 1.81030000  |
| C | 8.11230000  | -2.19580000 | -0.84570000 |
| H | 8.70270000  | -2.72490000 | -0.06290000 |
| H | 8.52410000  | -1.16680000 | -0.89710000 |
| C | 8.27230000  | -2.89250000 | -2.19200000 |
| H | 9.31980000  | -2.88850000 | -2.51480000 |
| H | 7.68430000  | -2.39600000 | -2.97300000 |
| H | 7.94810000  | -3.93930000 | -2.14970000 |
| C | 2.94890000  | 2.94360000  | -2.42470000 |
| H | 2.76110000  | 3.97680000  | -2.10230000 |
| H | 2.25930000  | 2.70260000  | -3.24390000 |
| H | 3.96530000  | 2.91760000  | -2.83340000 |
| C | -0.01050000 | 1.65860000  | 1.49470000  |
| H | -0.77570000 | 1.17050000  | 0.87000000  |
| H | -0.31700000 | 2.71940000  | 1.57390000  |
| H | -0.06280000 | 1.21220000  | 2.49540000  |
| C | 2.98590000  | 2.65790000  | 4.22230000  |
| H | 3.12790000  | 2.19110000  | 5.20390000  |
| H | 2.18660000  | 3.39990000  | 4.32410000  |
| H | 3.91390000  | 3.19500000  | 3.98000000  |
| C | 0.17340000  | 4.05170000  | -1.41180000 |
| H | 0.66250000  | 4.03680000  | -2.41160000 |
| C | -0.01920000 | 5.47920000  | -0.85020000 |
| H | 0.85250000  | 5.72270000  | -0.19380000 |
| C | -1.36630000 | 5.73370000  | -0.12300000 |
| H | -2.07090000 | 6.20110000  | -0.86820000 |
| C | -1.95900000 | 4.38990000  | 0.33050000  |
| H | -2.89980000 | 4.55140000  | 0.89870000  |
| H | -1.27110000 | 3.87000000  | 1.03970000  |
| C | -2.20560000 | 3.51500000  | -0.89430000 |
| H | -2.81650000 | 4.04600000  | -1.66190000 |
| C | -2.79010000 | 2.15330000  | -0.56940000 |
| H | -3.06380000 | 1.60760000  | -1.48030000 |
| H | -3.69510000 | 2.24780000  | 0.05010000  |
| H | -2.07650000 | 1.52720000  | -0.00710000 |
| C | -0.95780000 | 8.05970000  | 0.59850000  |
| H | -1.67860000 | 8.39100000  | -0.16620000 |
| H | 0.06300000  | 8.19310000  | 0.21310000  |
| H | -1.08450000 | 8.73730000  | 1.46120000  |
| C | -0.37510000 | 6.22500000  | 2.11730000  |
| H | -0.74250000 | 5.26940000  | 2.52860000  |
| H | -0.40430000 | 6.95540000  | 2.94220000  |



|    |             |             |             |
|----|-------------|-------------|-------------|
| H  | 0.67290000  | 6.08880000  | 1.80960000  |
| C  | 1.56310000  | -1.14150000 | -2.76570000 |
| H  | 2.41910000  | -1.84780000 | -2.61530000 |
| C  | 0.86920000  | -1.27590000 | -4.12020000 |
| H  | 1.14560000  | -2.26390000 | -4.54530000 |
| H  | 1.31420000  | -0.52840000 | -4.82000000 |
| C  | -0.65350000 | -1.11720000 | -4.14980000 |
| C  | -1.33610000 | -1.45400000 | -2.78950000 |
| H  | -1.46880000 | -2.55010000 | -2.66560000 |
| C  | -0.57420000 | -0.85560000 | -1.58840000 |
| H  | -0.49160000 | 0.26230000  | -1.67330000 |
| C  | -1.27540000 | -1.95450000 | -5.27440000 |
| H  | -0.89460000 | -1.63180000 | -6.25290000 |
| H  | -2.36410000 | -1.81200000 | -5.30350000 |
| H  | -1.06980000 | -3.02180000 | -5.15910000 |
| C  | -0.43480000 | 1.35770000  | -3.96440000 |
| H  | -0.91450000 | 2.18910000  | -4.49360000 |
| H  | 0.64190000  | 1.32300000  | -4.16670000 |
| H  | -0.61690000 | 1.42940000  | -2.87910000 |
| C  | -1.09790000 | -1.29170000 | -0.23640000 |
| H  | -0.36070000 | -1.08440000 | 0.56040000  |
| H  | -1.29460000 | -2.38030000 | -0.16680000 |
| H  | -2.03680000 | -0.78970000 | 0.03760000  |
| Cl | -4.99530000 | 2.97510000  | 2.44850000  |
| N  | -2.79910000 | -3.47040000 | 2.37850000  |
| H  | -2.36890000 | -3.54600000 | 3.31050000  |
| N  | -6.79060000 | -1.83810000 | 2.54970000  |
| H  | -7.55880000 | -1.47680000 | 3.13020000  |
| N  | -5.53210000 | -2.70330000 | -1.66240000 |
| H  | -6.30090000 | -3.41050000 | -1.56230000 |
| O  | -5.67050000 | 0.45310000  | -1.52550000 |
| H  | -6.25190000 | 1.01980000  | -0.97190000 |
| C  | -4.28850000 | -1.52770000 | 2.55160000  |
| C  | -4.13890000 | -2.92790000 | 2.53740000  |
| C  | -2.72390000 | -4.79830000 | 1.68220000  |
| H  | -3.58530000 | -5.46850000 | 1.94320000  |
| C  | -4.15100000 | -4.38550000 | -0.39530000 |
| H  | -4.58550000 | -5.37020000 | -0.64250000 |
| H  | -4.78130000 | -3.97010000 | 0.43640000  |
| C  | -5.65830000 | -1.73370000 | -0.49070000 |
| H  | -6.73430000 | -1.53360000 | -0.28080000 |
| C  | -5.28230000 | -3.74860000 | 2.81920000  |
| H  | -5.12150000 | -4.81100000 | 2.99690000  |
| C  | -6.53270000 | -3.23020000 | 2.86560000  |
| H  | -7.41850000 | -3.80890000 | 3.09300000  |
| C  | -4.19370000 | -3.44560000 | -1.60210000 |
| H  | -3.37350000 | -2.68100000 | -1.54090000 |
| H  | -4.03730000 | -3.99860000 | -2.55120000 |
| C  | -3.21230000 | -0.60620000 | 2.51030000  |
| H  | -2.20040000 | -0.99680000 | 2.51650000  |
| C  | -4.72270000 | 1.25850000  | 2.53150000  |
| C  | -5.63370000 | -0.96330000 | 2.61330000  |
| C  | -2.72680000 | -4.55720000 | 0.14810000  |
| H  | -2.21920000 | -5.38890000 | -0.36970000 |
| H  | -2.11180000 | -3.64510000 | -0.05200000 |
| C  | -5.84300000 | 0.40350000  | 2.61800000  |
| H  | -6.83830000 | 0.83130000  | 2.68950000  |
| C  | -4.90010000 | -0.42650000 | -0.69270000 |
| H  | -4.68920000 | 0.05360000  | 0.28930000  |
| H  | -3.94050000 | -0.55570000 | -1.24280000 |
| C  | -3.42640000 | 0.77450000  | 2.51340000  |
| H  | -2.58240000 | 1.45950000  | 2.50900000  |
| C  | -5.69630000 | -1.99680000 | -3.00850000 |
| H  | -4.70620000 | -1.56960000 | -3.32240000 |
| H  | -6.35640000 | -1.09860000 | -2.87100000 |
| C  | -1.42340000 | -5.50640000 | 2.09430000  |
| H  | -1.40790000 | -5.72590000 | 3.16780000  |

|   |             |             |             |
|---|-------------|-------------|-------------|
| H | -0.54300000 | -4.88700000 | 1.87910000  |
| H | -1.29730000 | -6.45660000 | 1.56720000  |
| C | -6.25610000 | -2.94130000 | -4.05340000 |
| H | -6.35420000 | -2.41730000 | -5.01950000 |
| H | -7.26010000 | -3.31070000 | -3.80650000 |
| H | -5.61140000 | -3.80940000 | -4.24180000 |
| C | 3.50200000  | -0.84170000 | 3.36130000  |
| H | 2.65220000  | -1.14850000 | 2.69040000  |
| O | 4.93080000  | 0.99730000  | 2.75360000  |
| H | -5.49866404 | -2.18169715 | 0.47894680  |
| H | -5.04528065 | -2.83713715 | -1.86852703 |

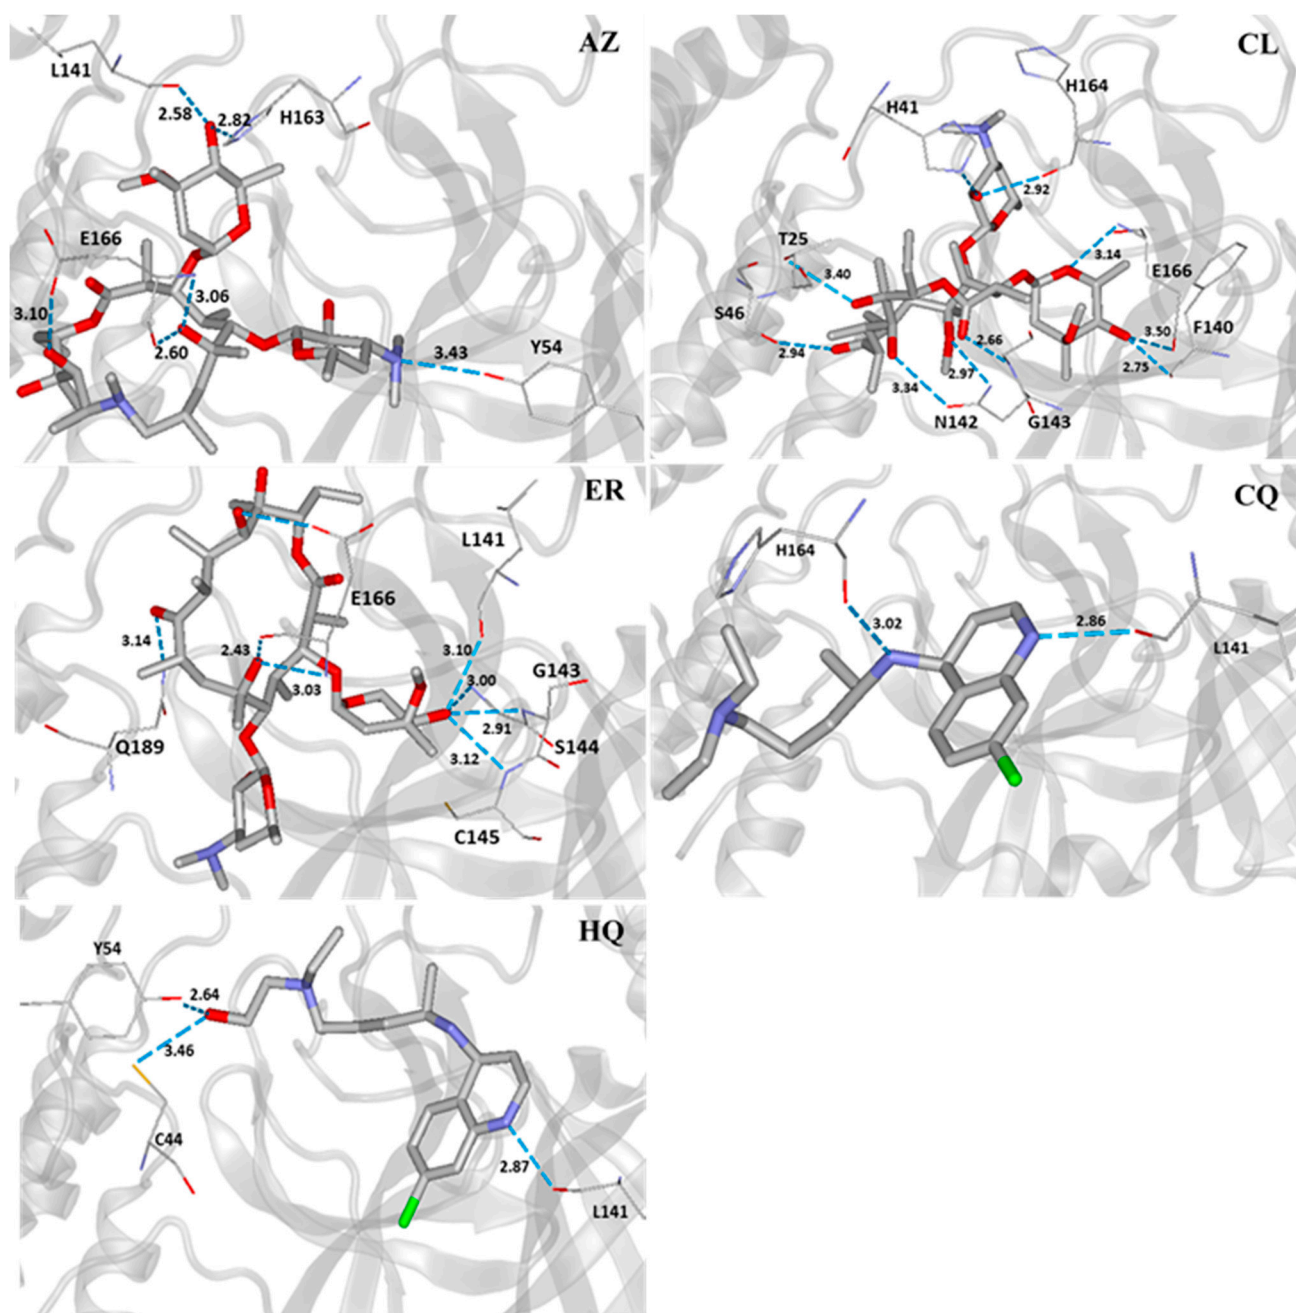

**Figure S1.** Intermolecular interactions of single-crystals in the viral M<sup>pro</sup> active site.
